# Supplementary material for: Preparation of monodispersed CuS nanocrystals in an oleic acid/paraffin system
Source: Royal Society of Chemistry journal article supplement (doi:10.1039/c5ra18475d), 2015-01-01
Supplement: c5ra18475d1.pdf [file c5ra18475d1.pdf]

## Electronic Supplementary Information

### Preparation of monodispersed CuS nanocrystals synthesized in an oleic acid/paraffin system

Xiaojiang Li<sup>a</sup>, Yanan Li<sup>a</sup>, Fei Xie<sup>b</sup>, Wei Li<sup>a</sup>, Wenjiang Li<sup>\*a</sup>, Minfang Chen<sup>a</sup> and Yue Zhao<sup>a</sup>

<sup>a</sup> Key Laboratory of Display Materials & Photoelectric Devices, School of Materials Science and Engineering, Tianjin University of Technology, Tianjin 300384, PR China. Fax: 0086-22-60214028; Tel: 0086-22-60214028; E-mail: liwj@tjut.edu.cn

<sup>b</sup> School of Chemistry and Chemical Engineering, Tianjin University of Technology, Tianjin 300384, PR China. E-mail: xiefei2013@foxmail.com

### TEM

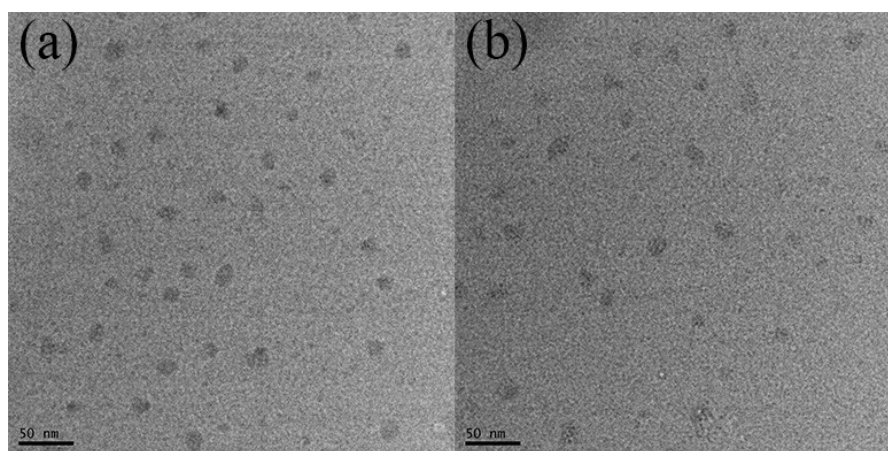

**Fig. S1** TEM images of CuS NCs with different molar ratio of Cu<sup>2+</sup> : S<sup>2-</sup> (a) 2:1, (b) 1:2.

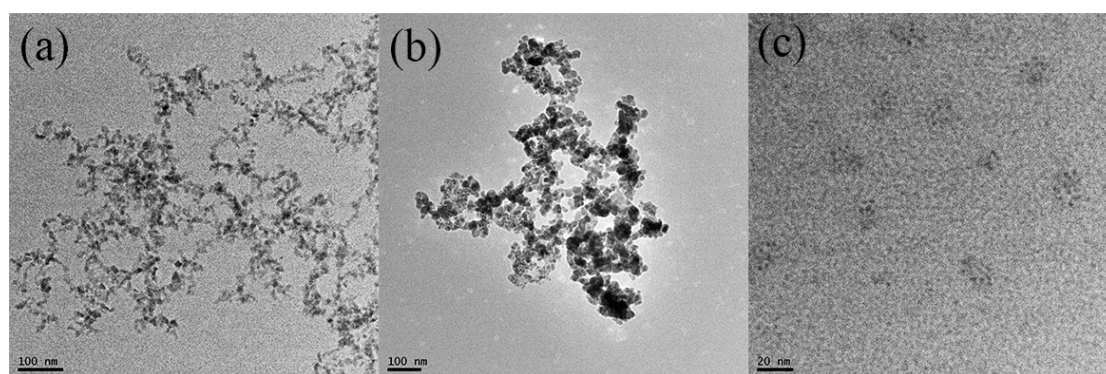

**Fig. S2** TEM image of as-prepared CuS NCs with different cleaning agents (a) none, (b) ethyl alcohol, (c) cyclohexane.

**UV-Vis absorption spectra**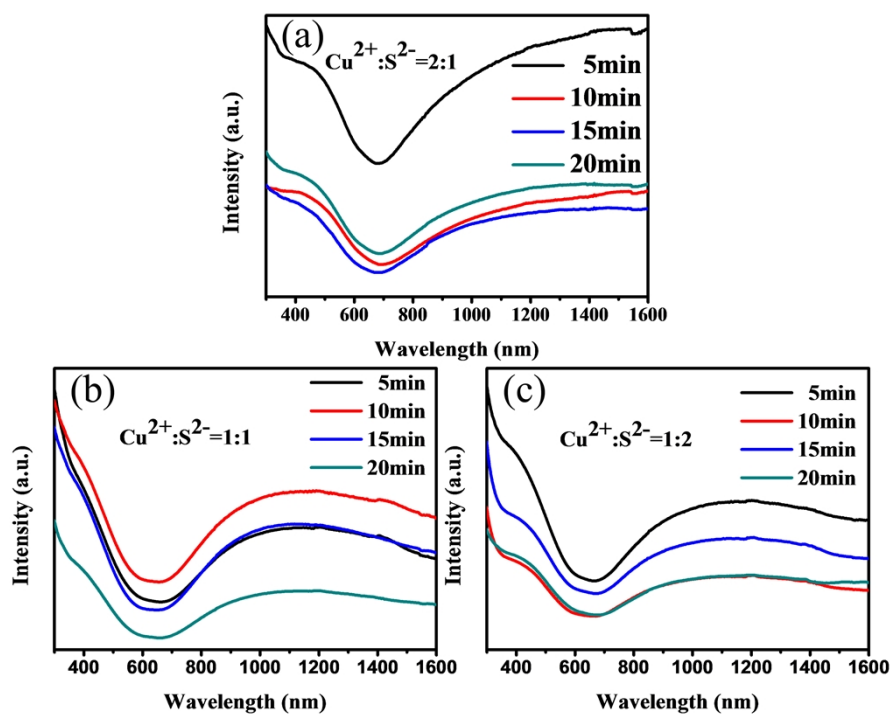

**Fig. S3** UV-Vis absorption spectra of as-prepared CuS NCs with different molar ratio (a) 2:1, (b) 1:1, (c) 1:2.

**PL excitation spectra**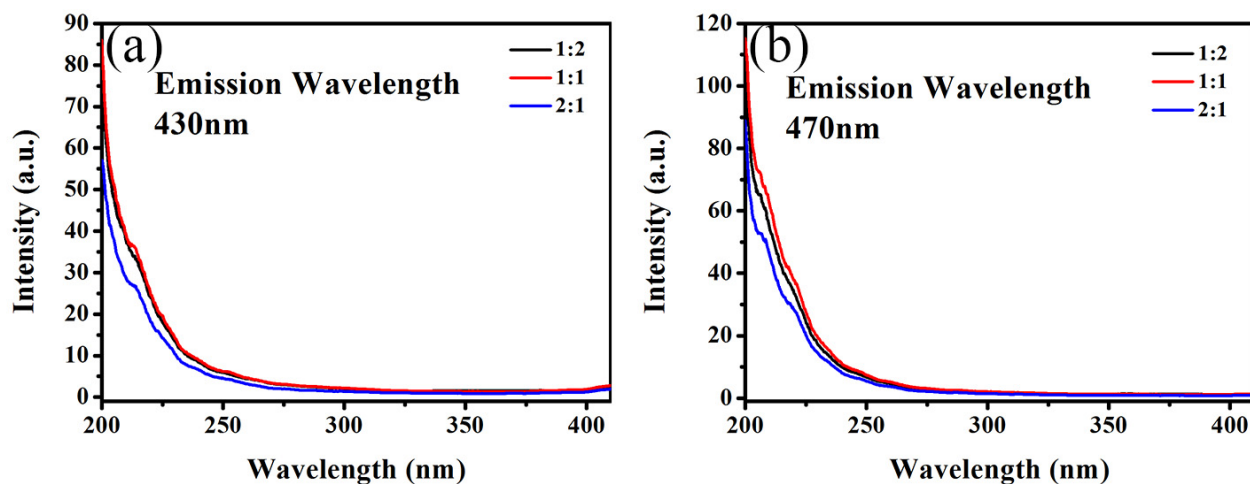

**Fig. S4** PL excitation spectra of as-prepared CuS NCs with different emission wavelength (a) 430 nm, (b) 470 nm.

**PL emission spectra**

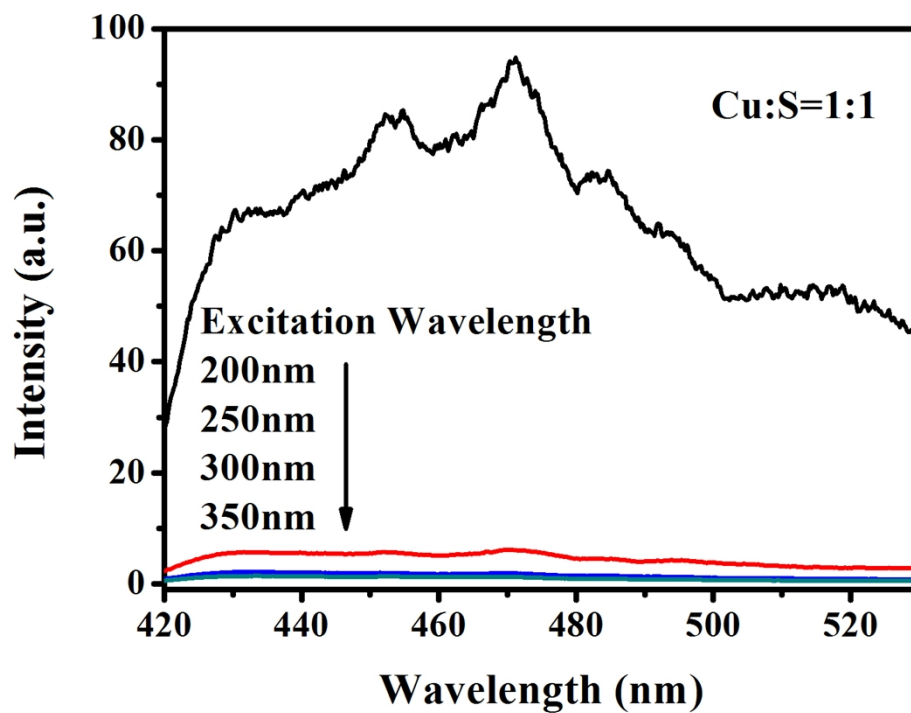

**Fig. S5** PL emission spectra of CuS NCs with 1:1 molar ratio of Cu<sup>2+</sup>:S<sup>2-</sup> with different excitation wavelength.
